# Supplementary material
Source: Springer Nature journal article supplement (https://www.springermedizin.de/resource/supplementary/12891_2012_1664_MOESM3_ESM.pdf/9509104)
Supplement: MOESM3 [file 9509104]

**Additional file 3: Table S3.** Table of primers and enzymes used for genotyping SNPs by RFLP analysis

| SNP       | Forward primer (5'-3')                             | Reverse primer (5'-3') | Enzyme |
|-----------|----------------------------------------------------|------------------------|--------|
| rs2615977 | GTTTTAAAACATCCCCAGATAATTATCATATTCCTG               | GTAACCTAACCTGCACGTTGT  | BsrI   |
| rs1676486 | GCATTTTGTAGGGTCCTCAAGGC                            | ACTTTGCTATGGTAGCCCTAGC | BsaI   |
| rs9659030 | GACCTACCTAATTGCTAAATGAATAACATATGGTGGACTGTTATTAACAG | ACTGTTCCAGTGAAATCTGG   | TspRI  |
